# Supplementary material for: Short-Term Outcomes Analysis Comparing Open, Laparoscopic, Laparoscopic-Assisted, and Robotic Distal Gastrectomy for Locally Advanced Gastric Cancer: A Randomized Trials Network Analysis
Source: MDPI journal article supplement (doi:10.3390/cancers16091620), 2024-04-23
Supplement: s1 [file s1]

| Author, year<br><i>country</i>    | Study<br>design            | Randomization method                                                        | Surgeons' eligibility                                                                                                                                | Surgical quality control                                                                                  | Blinding                               | Power<br>analysis |
|-----------------------------------|----------------------------|-----------------------------------------------------------------------------|------------------------------------------------------------------------------------------------------------------------------------------------------|-----------------------------------------------------------------------------------------------------------|----------------------------------------|-------------------|
| Huscher, 2005<br><i>Italy</i>     | nr                         | nr                                                                          | Single experienced surgeon                                                                                                                           | nr                                                                                                        | no                                     | nr                |
| Jin chen Hu,<br>2012 <i>China</i> | nr                         | nr                                                                          | nr                                                                                                                                                   | nr                                                                                                        | P: blind. S: not<br>blind. Stat: blind | Y                 |
| Yanfeng Hu,<br>2016 <i>China</i>  | non-<br>inferiority<br>RCT | Computer-based stratified (institution,<br>age, histology preoperative TNM) | >50 ODG and >50 LADG<br>>300 gastrectomies/year per institution,<br>qualified surgeons based on National<br>academic committee                       | Video review and photographic<br>documentation resection margins,<br>abdominal incisions, lymphadenectomy | no                                     | Y                 |
| Shi, 2018<br><i>China</i>         | non-<br>inferiority<br>RCT | Block randomization<br>(fixed block size=ABBA)                              | >50 LADG<br>>50 ODG                                                                                                                                  | Video review and photographic<br>documentation                                                            | no                                     | Y                 |
| Park, 2018<br><i>Korea</i>        | nr                         | Web-based randomization system with<br>fixed block size 1:1 randomization   | >30 LADG                                                                                                                                             | Surgical checklist evaluation                                                                             | no                                     | Y                 |
| Wang, 2019<br><i>China</i>        | non-<br>inferiority<br>RCT | Computer-based non-stratified 1:1<br>randomization                          | >60 LADG<br>>60 ODG                                                                                                                                  | Video review and photographic<br>documentation resection margins,<br>abdominal incisions, lymphadenectomy | no                                     | Y                 |
| Li, 2019<br><i>China</i>          | non-<br>inferiority<br>RCT | Computer-based stratified 1:1<br>randomization                              | >600 total LADG<br>annual surgical volume of<br>approximately 300 LADG/ODG                                                                           | nr                                                                                                        | no                                     | nr                |
| Lee, 2019<br><i>Korea</i>         | non-<br>inferiority<br>RCT | Stratified 1:1 randomization using a<br>confidential block size             | >50 LADG<br>>50 ODG                                                                                                                                  | Video review and photographic<br>documentation resection margins,<br>abdominal incisions, lymphadenectomy | no                                     | Y                 |
| Lu, 2021<br><i>China</i>          | non-<br>inferiority<br>RCT | Computer-based stratified 1:1 (LDG<br>vs. RDG) ratio                        | >300 LADG<br>>50 RDG                                                                                                                                 | Video review and photographic<br>documentation resection margins,<br>abdominal incisions, lymphadenectomy | no                                     | Y                 |
| Etoh, 2023<br><i>Japan</i>        | non-<br>inferiority<br>RCT | Computer-based stratified (histology<br>preoperative TNM, institution)      | > 50 ODG and > 20 gastrectomies/year<br>per institution, qualified surgeons<br>according to Endoscopic Surgical Skill<br>Qualification System (JSES) | Photographic documentation review                                                                         | no                                     | nr                |

**Supplementary Table S1.** Randomized Clinical Trials (RCTs) quality evaluation. Open Distal Gastrectomy (**ODG**), Laparoscopic Distal Gastrectomy (**LDG**), Laparoscopic-Assisted Distal Gastrectomy (**LADG**), and Robotic Distal Gastrectomy (**RDG**). P patient, S surgeon, Stat statistician, Y yes, UP under-powered, JSES Japan Society for Endoscopic Surgery.
